# Supplementary material for: Toxic Metals Depuration Profiles from a Population Adjacent to a Military Target Range (Vieques) and Main Island Puerto Rico
Source: PubMed Central journal article supplement (PMC6994965; doi:10.3390/ijerph17010264), 2019-12-30
Supplement: ijerph-17-00264-s001.pdf [file ijerph-17-00264-s001.pdf]

**Table S1.** Correlations between trace elements found in urine collected from Main Island Puerto Rico subjects. Outliers were considered within  $Q < 0.01$  and not taken into consideration in the analysis to account for extreme values.

|           | <b>Pb</b> | <b>Hg</b> | <b>Al</b> | <b>Sb</b> | <b>As</b> | <b>Ba</b> | <b>Bi</b> | <b>Cd</b> | <b>Cs</b> | <b>Gd</b> | <b>Ga</b> | <b>Ni</b> | <b>Nb</b> | <b>Pt</b> | <b>Rb</b> | <b>Tl</b> | <b>Th</b> | <b>Sn</b> | <b>W</b> | <b>U</b> |
|-----------|-----------|-----------|-----------|-----------|-----------|-----------|-----------|-----------|-----------|-----------|-----------|-----------|-----------|-----------|-----------|-----------|-----------|-----------|----------|----------|
| <b>Pb</b> | 100%      | 31%       | 78%       | 34%       | 5%        | 13%       | 33%       | 88%       | 46%       | 29%       | 52%       | -7%       | 28%       | -7%       | 29%       | 25%       | Null      | 18%       | 37%      | 70%      |
| <b>Hg</b> | 31%       | 100%      | 23%       | 32%       | 21%       | 19%       | 17%       | 33%       | 26%       | 19%       | 14%       | 4%        | -9%       | -13%      | 24%       | 26%       | Null      | -4%       | 26%      | 12%      |
| <b>Al</b> | 78%       | 23%       | 100%      | 37%       | 4%        | 19%       | 26%       | 77%       | 52%       | 32%       | 57%       | 5%        | 13%       | -8%       | 35%       | 30%       | Null      | 7%        | 37%      | 67%      |
| <b>Sb</b> | 34%       | 32%       | 37%       | 100%      | 3%        | 20%       | 5%        | 28%       | 42%       | 11%       | 53%       | 29%       | -6%       | -12%      | 48%       | 13%       | Null      | 25%       | 56%      | 27%      |
| <b>As</b> | 5%        | 21%       | 4%        | 3%        | 100%      | 37%       | 0%        | -2%       | 26%       | 4%        | -10%      | -2%       | -13%      | -8%       | 29%       | 31%       | Null      | 0%        | -4%      | -4%      |
| <b>Ba</b> | 13%       | 19%       | 19%       | 20%       | 37%       | 100%      | 20%       | 8%        | 27%       | 11%       | 20%       | 6%        | -13%      | -12%      | 33%       | 21%       | Null      | 19%       | 8%       | 14%      |
| <b>Bi</b> | 33%       | 17%       | 26%       | 5%        | 0%        | 20%       | 100%      | 45%       | 16%       | 29%       | 11%       | 18%       | -7%       | -4%       | -7%       | -2%       | Null      | 15%       | 12%      | 25%      |
| <b>Cd</b> | 88%       | 33%       | 77%       | 28%       | -2%       | 8%        | 45%       | 100%      | 51%       | 36%       | 45%       | -8%       | 4%        | -4%       | 19%       | 10%       | Null      | 7%        | 27%      | 68%      |
| <b>Cs</b> | 46%       | 26%       | 52%       | 42%       | 26%       | 27%       | 16%       | 51%       | 100%      | 21%       | 45%       | -3%       | -19%      | -11%      | 72%       | 46%       | Null      | 31%       | 42%      | 18%      |
| <b>Gd</b> | 29%       | 19%       | 32%       | 11%       | 4%        | 11%       | 29%       | 36%       | 21%       | 100%      | 11%       | -14%      | -8%       | -4%       | 10%       | 15%       | Null      | 11%       | 7%       | 26%      |
| <b>Ga</b> | 52%       | 14%       | 57%       | 53%       | -10%      | 20%       | 11%       | 45%       | 45%       | 11%       | 100%      | 10%       | 12%       | -3%       | 44%       | 27%       | Null      | 26%       | 48%      | 38%      |
| <b>Ni</b> | -7%       | 4%        | 5%        | 29%       | -2%       | 6%        | 18%       | -8%       | -3%       | -14%      | 10%       | 100%      | 11%       | -1%       | -1%       | -8%       | Null      | 12%       | 0%       | 30%      |
| <b>Nb</b> | 28%       | -9%       | 13%       | -6%       | -13%      | -13%      | -7%       | 4%        | -19%      | -8%       | 12%       | 11%       | 100%      | -2%       | -12%      | 18%       | Null      | 0%        | 18%      | 43%      |
| <b>Pt</b> | -7%       | -13%      | -8%       | -12%      | -8%       | -12%      | -4%       | -4%       | -11%      | -4%       | -3%       | -1%       | -2%       | 100%      | -11%      | 13%       | Null      | -7%       | -14%     | -2%      |
| <b>Rb</b> | 29%       | 24%       | 35%       | 48%       | 29%       | 33%       | -7%       | 19%       | 72%       | 10%       | 44%       | -1%       | -12%      | -11%      | 100%      | 55%       | Null      | 22%       | 55%      | 5%       |
| <b>Tl</b> | 25%       | 26%       | 30%       | 13%       | 31%       | 21%       | -2%       | 10%       | 46%       | 15%       | 27%       | -8%       | 18%       | 13%       | 55%       | 100%      | Null      | 3%        | 16%      | 4%       |
| <b>Th</b> | Null      | Null      | Null      | Null      | Null      | Null      | Null      | Null      | Null      | Null      | Null      | Null      | Null      | Null      | Null      | Null      | Null      | Null      | Null     | Null     |
| <b>Sn</b> | 18%       | -4%       | 7%        | 25%       | 0%        | 19%       | 15%       | 7%        | 31%       | 11%       | 26%       | 12%       | 0%        | -7%       | 22%       | 3%        | Null      | 100%      | 36%      | 2%       |
| <b>W</b>  | 37%       | 26%       | 37%       | 56%       | -4%       | 8%        | 12%       | 27%       | 42%       | 7%        | 48%       | 0%        | 18%       | -14%      | 55%       | 16%       | Null      | 36%       | 100%     | 14%      |
| <b>U</b>  | 70%       | 12%       | 67%       | 27%       | -4%       | 14%       | 25%       | 68%       | 18%       | 26%       | 38%       | 30%       | 43%       | -2%       | 5%        | 4%        | Null      | 2%        | 14%      | 100%     |

**Table S2.** Correlations between trace elements found in urine collected from Vieques subjects. Outliers were considered within  $Q < 0.01$  and not taken into consideration in the analysis to account for extreme values.

|           | <b>Pb</b>   | <b>Hg</b>   | <b>Al</b>   | <b>Sb</b>   | <b>As</b>   | <b>Ba</b>   | <b>Bi</b>   | <b>Cd</b>   | <b>Cs</b>   | <b>Gd</b>   | <b>Ga</b>   | <b>Ni</b>   | <b>Nb</b> | <b>Pt</b>   | <b>Rb</b>   | <b>Tl</b>   | <b>Th</b> | <b>Sn</b>   | <b>W</b>    | <b>U</b>    |
|-----------|-------------|-------------|-------------|-------------|-------------|-------------|-------------|-------------|-------------|-------------|-------------|-------------|-----------|-------------|-------------|-------------|-----------|-------------|-------------|-------------|
| <b>Pb</b> | <b>100%</b> | 56%         | 6%          | -10%        | 2%          | 37%         | -15%        | 18%         | -4%         | 7%          | 2%          | -8%         | Null      | 4%          | -2%         | 3%          | Null      | 0%          | 3%          | 27%         |
| <b>Hg</b> | 56%         | <b>100%</b> | 36%         | -17%        | 19%         | 38%         | -24%        | 26%         | 16%         | 12%         | 15%         | -10%        | Null      | -10%        | 13%         | 24%         | Null      | 3%          | 13%         | 54%         |
| <b>Al</b> | 6%          | 36%         | <b>100%</b> | -10%        | 29%         | -4%         | -10%        | 73%         | 36%         | 7%          | 40%         | 0%          | Null      | -18%        | 48%         | 26%         | Null      | 0%          | 6%          | 36%         |
| <b>Sb</b> | -10%        | -17%        | -10%        | <b>100%</b> | -19%        | -1%         | -5%         | -12%        | 21%         | -2%         | -20%        | -7%         | Null      | -9%         | 2%          | -7%         | Null      | -6%         | -9%         | 4%          |
| <b>As</b> | 2%          | 19%         | 29%         | -19%        | <b>100%</b> | -10%        | -17%        | 40%         | -1%         | 29%         | 9%          | 30%         | Null      | 7%          | 16%         | 24%         | Null      | -9%         | -22%        | -2%         |
| <b>Ba</b> | 37%         | 38%         | -4%         | -1%         | -10%        | <b>100%</b> | -17%        | 6%          | 29%         | -9%         | 28%         | -19%        | Null      | -4%         | 1%          | 27%         | Null      | 63%         | 19%         | 7%          |
| <b>Bi</b> | -15%        | -24%        | -10%        | -5%         | -17%        | -17%        | <b>100%</b> | -18%        | -6%         | -4%         | 16%         | -4%         | Null      | -5%         | -5%         | -15%        | Null      | -5%         | 52%         | -23%        |
| <b>Cd</b> | 18%         | 26%         | 73%         | -12%        | 40%         | 6%          | -18%        | <b>100%</b> | 42%         | 19%         | 44%         | 22%         | Null      | 9%          | 58%         | 40%         | Null      | 11%         | -14%        | 53%         |
| <b>Cs</b> | -4%         | 16%         | 36%         | 21%         | -1%         | 29%         | -6%         | 42%         | <b>100%</b> | 9%          | 51%         | 3%          | Null      | -23%        | 83%         | 71%         | Null      | 36%         | 21%         | 25%         |
| <b>Gd</b> | 7%          | 12%         | 7%          | -2%         | 29%         | -9%         | -4%         | 19%         | 9%          | <b>100%</b> | 16%         | -6%         | Null      | -7%         | 4%          | 15%         | Null      | 0%          | -8%         | 14%         |
| <b>Ga</b> | 2%          | 15%         | 40%         | -20%        | 9%          | 28%         | 16%         | 44%         | 51%         | 16%         | <b>100%</b> | 0%          | Null      | -4%         | 36%         | 37%         | Null      | 58%         | 23%         | 25%         |
| <b>Ni</b> | -8%         | -10%        | 0%          | -7%         | 30%         | -19%        | -4%         | 22%         | 3%          | -6%         | 0%          | <b>100%</b> | Null      | 76%         | 5%          | -2%         | Null      | -5%         | 3%          | 1%          |
| <b>Nb</b> | Null        | Null        | Null        | Null        | Null        | Null        | Null        | Null        | Null        | Null        | Null        | Null        | Null      | Null        | Null        | Null        | Null      | Null        | Null        | Null        |
| <b>Pt</b> | 4%          | -10%        | -18%        | -9%         | 7%          | -4%         | -5%         | 9%          | -23%        | -7%         | -4%         | 76%         | Null      | <b>100%</b> | -23%        | -25%        | Null      | -13%        | -11%        | 5%          |
| <b>Rb</b> | -2%         | 13%         | 48%         | 2%          | 16%         | 1%          | -5%         | 58%         | 83%         | 4%          | 36%         | 5%          | Null      | -23%        | <b>100%</b> | 69%         | Null      | -2%         | 4%          | 27%         |
| <b>Tl</b> | 3%          | 24%         | 26%         | -7%         | 24%         | 27%         | -15%        | 40%         | 71%         | 15%         | 37%         | -2%         | Null      | -25%        | 69%         | <b>100%</b> | Null      | 25%         | 3%          | 32%         |
| <b>Th</b> | Null        | Null        | Null        | Null        | Null        | Null        | Null        | Null        | Null        | Null        | Null        | Null        | Null      | Null        | Null        | Null        | Null      | Null        | Null        | Null        |
| <b>Sn</b> | 0%          | 3%          | 0%          | -6%         | -9%         | 63%         | -5%         | 11%         | 36%         | 0%          | 58%         | -5%         | Null      | -13%        | -2%         | 25%         | Null      | <b>100%</b> | 24%         | -7%         |
| <b>W</b>  | 3%          | 13%         | 6%          | -9%         | -22%        | 19%         | 52%         | -14%        | 21%         | -8%         | 23%         | 3%          | Null      | -11%        | 4%          | 3%          | Null      | 24%         | <b>100%</b> | -9%         |
| <b>U</b>  | 27%         | 54%         | 36%         | 4%          | -2%         | 7%          | -23%        | 53%         | 25%         | 14%         | 25%         | 1%          | Null      | 5%          | 27%         | 32%         | Null      | -7%         | -9%         | <b>100%</b> |
